# Supplementary material for: Monitoring tar spot disease in corn at different canopy and temporal levels using aerial multispectral imaging and machine learning
Source: Front Plant Sci. 2023 Jan 23;13:1077403. doi: 10.3389/fpls.2022.1077403 (PMC9900023; doi:10.3389/fpls.2022.1077403)
Supplement: Supplementary file 1 [file DataSheet_1.docx]

**Monitoring tar spot disease in corn at different canopy and temporal levels using aerial multispectral imaging and machine learning**

Chongyuan Zhang1, Brenden Lane1, Mariela Fernandez-Campos1, Andres Cruz-Sancan1, Da-Young Lee1, Carlos Gongora-Canul1, Tiffanna J. Ross1, Camila R. Da Silva1, Darcy E. P. Telenko1, Stephen B. Goodwin2, Steven R Scofield2, Sungchan Oh**3**, Jinha Jung**4**, and Christian D. Cruz1

1 Department of Botany and Plant Pathology, Purdue University, West Lafayette, Indiana 47907, U.S.A.

2 USDA-Agricultural Research Service, Crop Production and Pest Control Research Unit, West Lafayette, Indiana 47907, U.S.A.

3 Institute for Plant Sciences, Purdue University, West Lafayette, Indiana 47907, U.S.A.

4 Lyles School of Civil Engineering, Purdue University, West Lafayette, Indiana 47907, U.S.A.***** Correspondence:C. D. Cruz, [cruz113@purdue.edu](mailto:cruz113@purdue.edu)


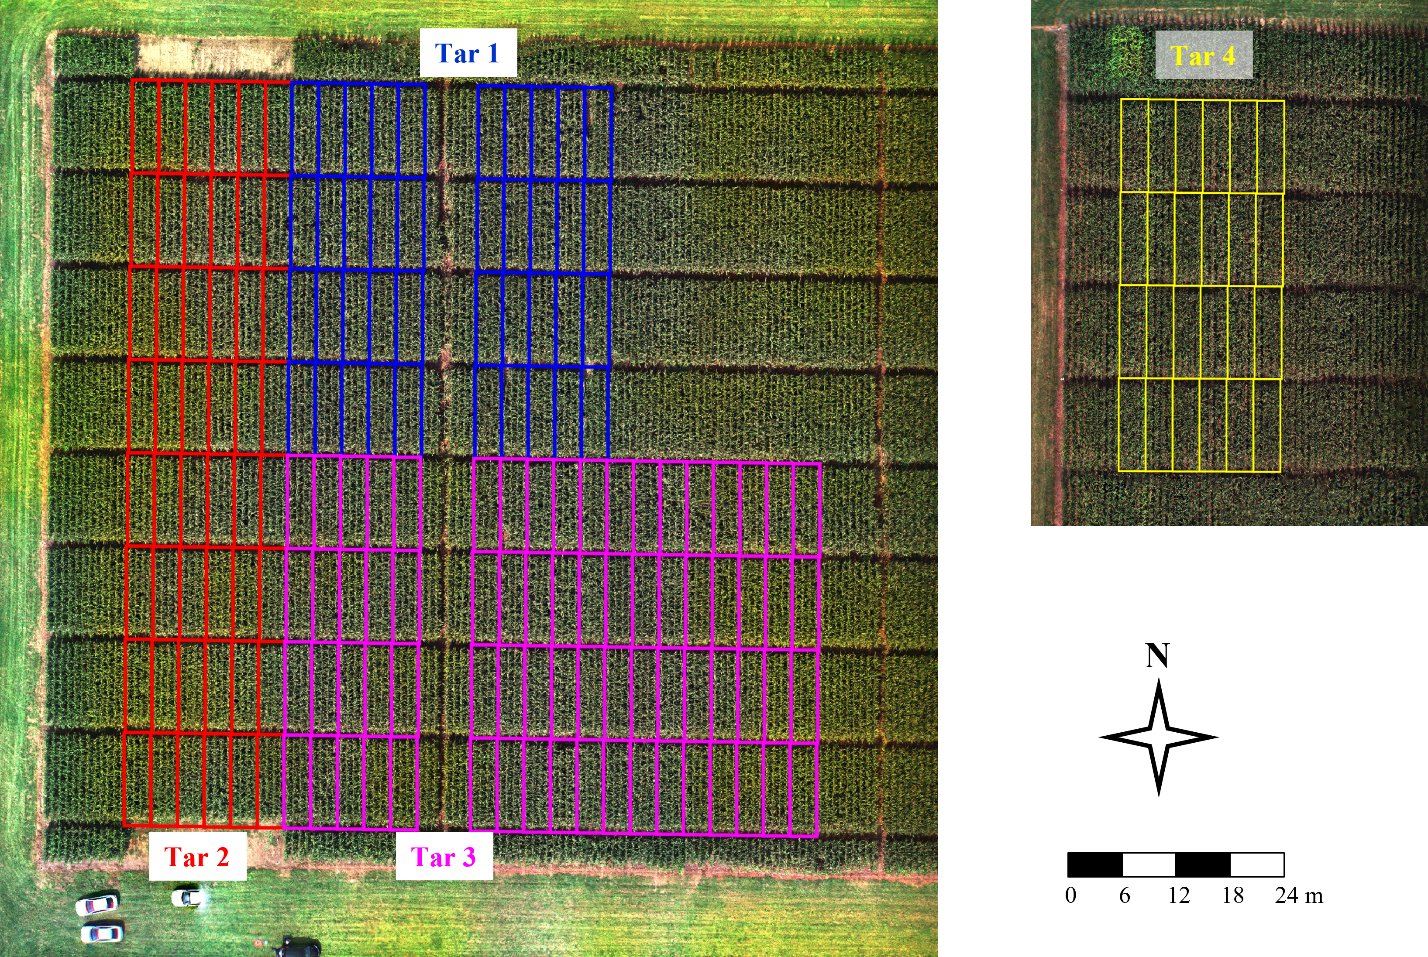


**Supplementary Figure 1.** Plot layouts of tar spot experiments during the 2020 growing season.


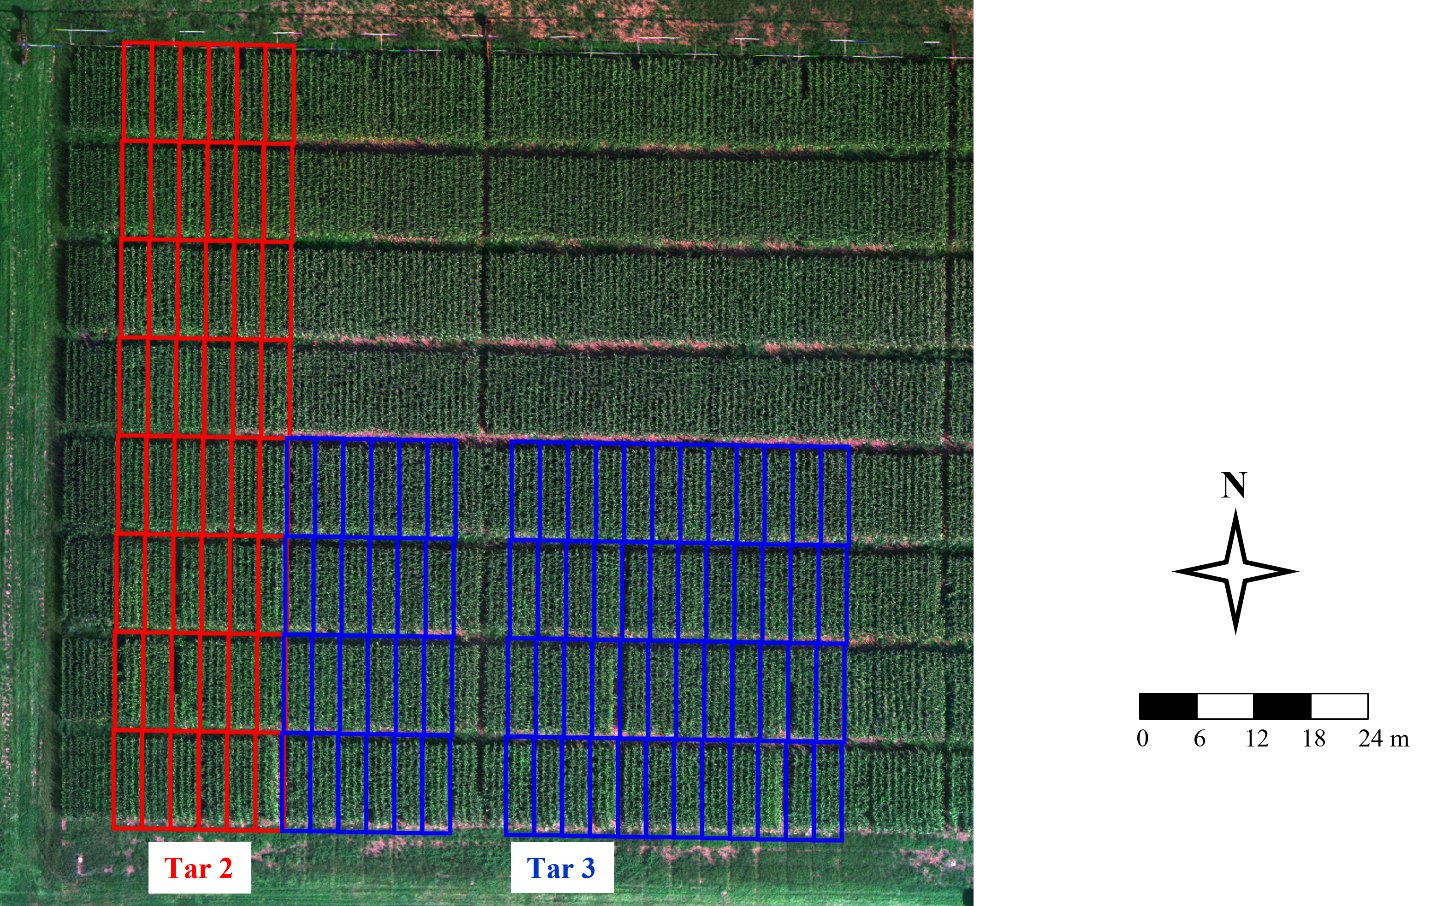


**Supplementary Figure 2.** Plot layouts of tar spot experiments during the 2021 growing season.


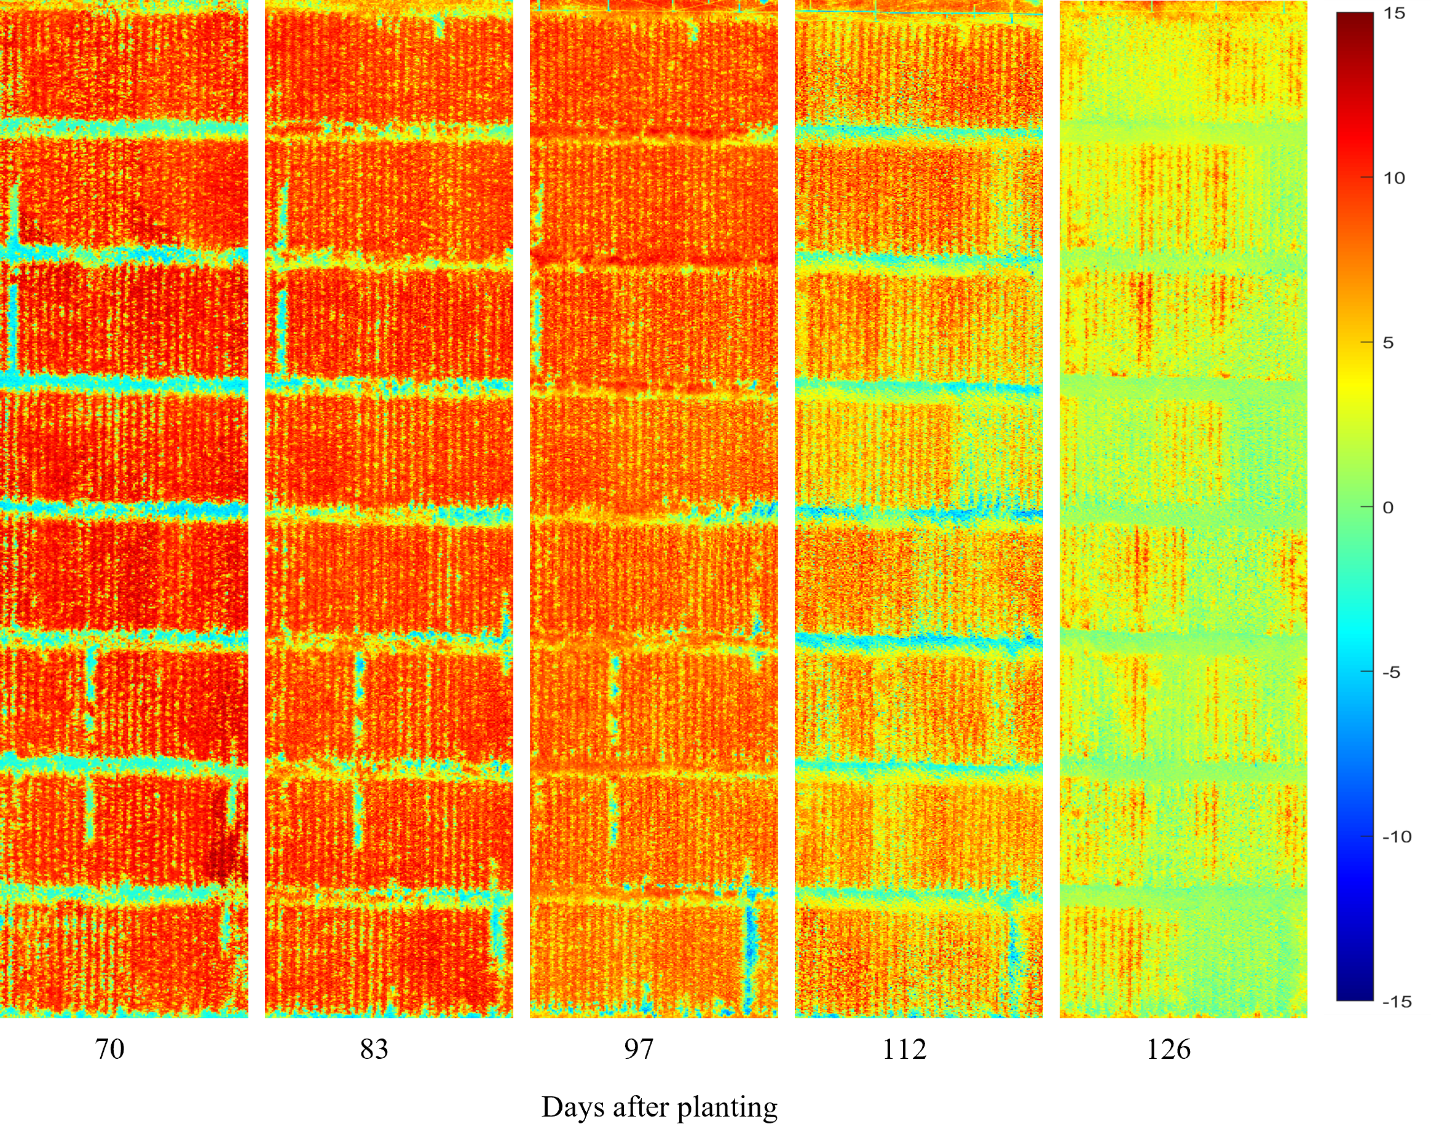


**Supplementary Figure 3.** Renormalized difference vegetation index (RDVI) map for plots (every four rows) from different days after planting of Tar 2 trial of 2021.


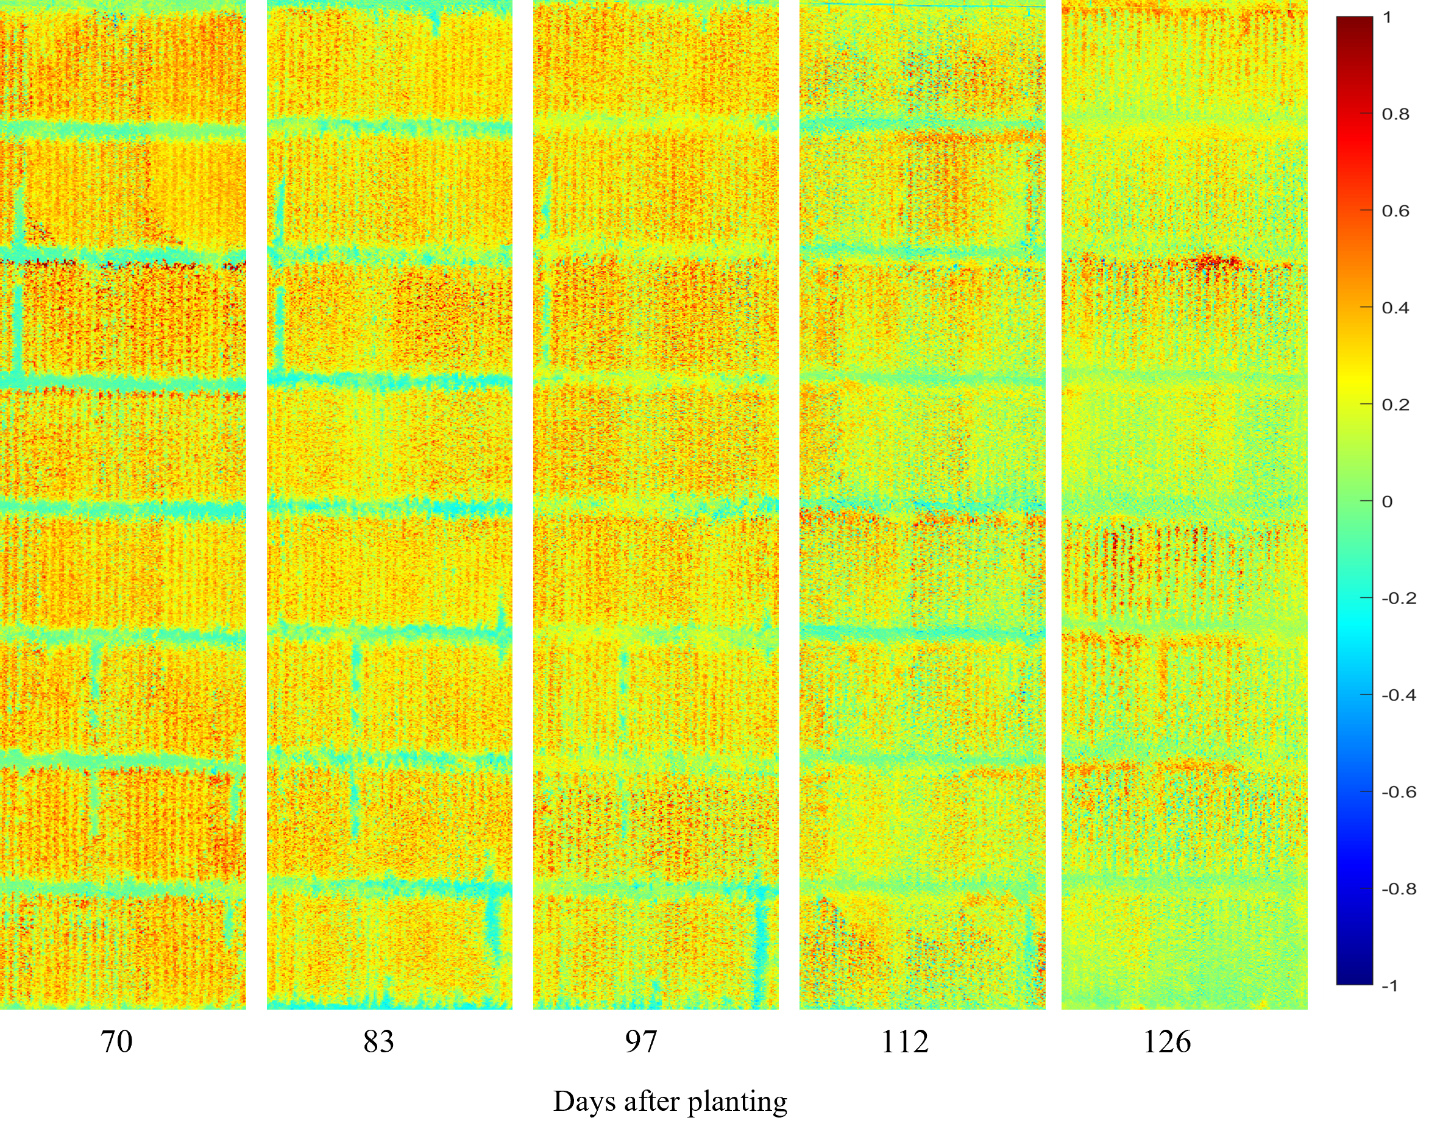
**Supplementary Figure 4.**  Red edge normalized difference vegetation index (NDRE) map for plots (every four rows) from different days after planting of Tar 2 trial of 2021.

**Supplementary Table 1.** Vegetation indices calculated using multispectral images in this study.

| Vegetation index | Full name | Equationa |
| --- | --- | --- |
| NDVI | Normalized difference vegetation index |  |
| GNDVI | Green normalized difference vegetation index |  |
| SAVI | Soil adjusted vegetation index |  |
| NDRE | Red edge normalized difference vegetation index |  |
| TVI | Triangular vegetation index | 0.5 * (120 * (NIR – Green) – 200*(Red – Green)) |
| ExG | Excess green | 2 * Green – Red – Blue |
| SR | simple ratio |  |
| PSRI | plant senescence reflectance index |  |
| G | green index | b |
| MCARI2 | modified chlorophyll absorption in reflectance index |  |
| GRVI | green-red vegetation index |  |
| RDVI | renormalized difference vegetation index |  |

a (Harris Geospatial Solutions, 2022), equations can be found in the referred website, except for the G; b (Zarco-Tejada et al., 2005); NIR: near infrared band; RE: red edge band.
